# Supplementary material
Source: Springer Nature journal article supplement (https://publikationen.ub.uni-frankfurt.de/files/22067/12864_2010_3436_MOESM2_ESM.pdf)
Supplement: MOESM2 [file 12864_2010_3436_MOESM2_ESM.pdf]

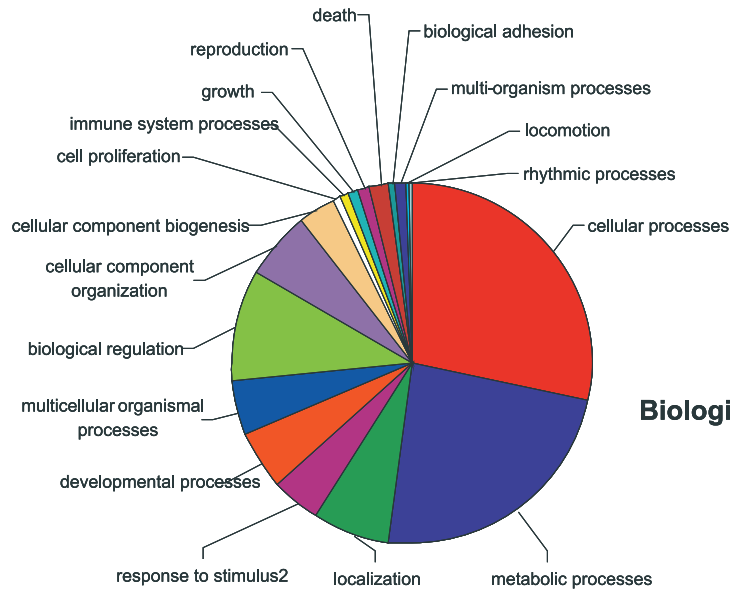

**Biological Process**

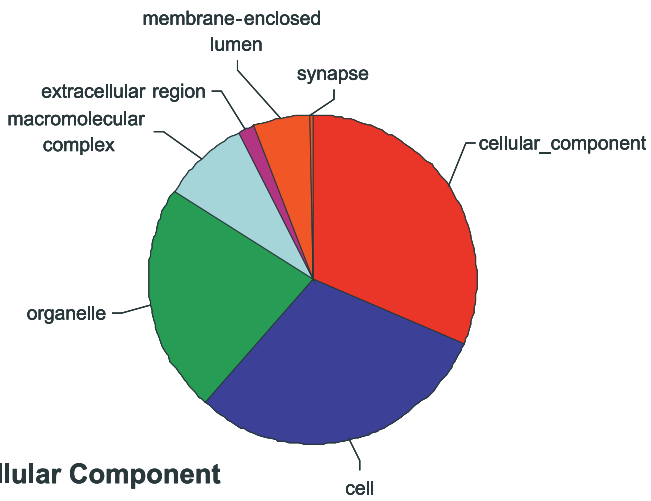

**Cellular Component**

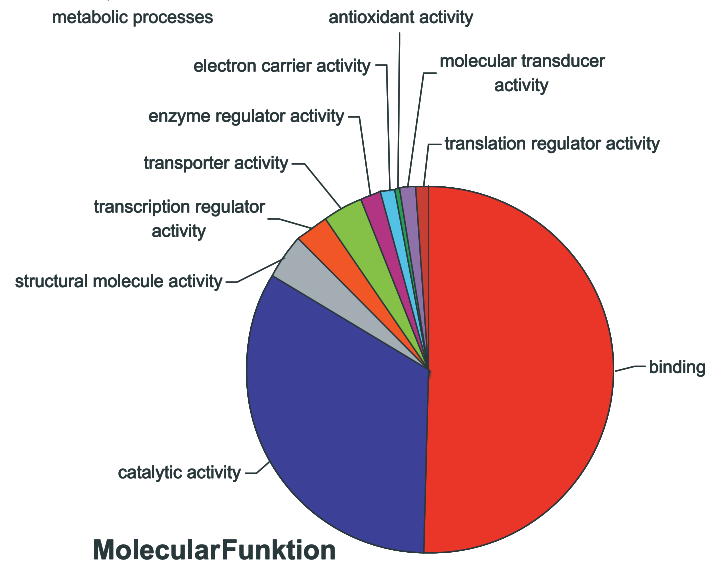

**Molecular Funktion**
